# Supplementary material
Source: publisher site journal article supplement (https://www.dovepress.com/article/295118)
Supplement: Supplementary file 1 [file get_supplementary_file.php]

**Supplementary file 1**

**Guidelines’ Adherence for Assessment and Empiric Antibiotics Recommendation for Community-Acquired Pneumonia at Ambo University Referral Hospital: Prospective Observational Study**

**Instructions:** Write your response on the space provided for open ended questions and encircle your response for close ended questions.

**I. Socio-demographic characteristics**

1. Age ------------------------ 2. Sex: A. Male B. Female
2. Occupation: A. Farmer B. Student C. governmental work D. Private employee
3. Religion: A. Protestant B. Orthodox C. Muslims D. Others
4. Ethnicity: A. Oromo B. Amhara C. Tigre D. Others
5. Marital status A. Married B. Single C. Divorced D.
6. Economic status A. < 1000 B. 100-2000 D. > 2000

II. **Clinical characteristics of patient admitted with Pneumonia**

1. Department: A. OPD B. Inpatient
2. Severity: A. Mild Pneumonia B. Severe Pneumonia
3. Taken antibiotic before 3 month A. Yes B. No
4. Taken antibiotic after discharge A. Yes B. No

III. **Investigations done**

1. Baseline O2 saturation Yes No if Yes, indicate the value ________________
2. Sputum Gram stain Yes No if Yes, indicate the value _______________
3. Sputum bacterial culture: Yes No if Yes, indicate the value ________________
4. Blood cultures Yes No if Yes indicate the value ________________
5. CXR (PA & lateral): Yes No if Yes, indicate the value ________________
6. Pleural fluid analysis:. Yes No if Yes, indicate the value ________________
7. Other labs Yes No if Yes, indicate the value ________________
8. **Parameters of patients admitted with Pneumonia**
9. Mental status: A. Altered B. Oriented
10. Respiratory rate, breaths/min: A. <30 B. >30
11. Blood pressure, mm Hg: A. < (90/60) B. >(90/60)
12. BUN, mmol/L: A. >19mg/dL B. < 19mg/dL
13. CRB 65 was uses a) Yes b) No
14. **Drug therapy** (________/________/______Drug name/strength/frequency/duration (days of admission)
15. Azithromycin _______/_________/_____________________
16. Erythromycin _________/_________/_____________________
17. Doxycycline _________/_________/_____________________
18. Ceftriaxone
19. Azithromycin **OR** Erythromycin + Amoxicillin _________/_________/_____________ + _________/_________/________________
20. Co-amoxiclav _________/_________/_____________________
21. Co-amoxiclav + clarithromycin OR Azithromycin _________/_________/______________ or _________/_________/_____________
22. Ceftriaxone + Azithromycin OR Erythromycin _________/_________/_______ + _________/_________/____________ OR _________/_________/_______________
23. Benzyl penicillin + Azithromycin OR Erythromycin _________/_________/__________+ _________/_________/____________ OR _________/_________/_______________
24. Ceftazidime + Vancomycin _________/_________/_____________ + _________/_________/________________
25. Ceftriaxone + Gentamicin ______________/_____________/_________________ + ____________/___________________/________________
26. Co-amoxiclav + clarithromycin + metronidazole _________/___________/____________ + _________/___________/___________ + __________/_________/_____________
27. + _________/_________/_______________ OR _________/_________/_______________
28. Ciprofloxacin ____________/____________/_________________
29. **Vancomycin +** _________ _________/_________/_____________ + ____________/___________/________________ (in the case of MRSA)
30. Analgesics given _________________ _________/_________/_________________
31. **Drug therapy** (________/________/______Drug name/strength/frequency/duration (After 48hrs)
32. Azithromycin _______/_________/_____________________
33. Erythromycin _________/_________/_____________________
34. Doxycycline _________/_________/_____________________
35. Ceftriaxone
36. Azithromycin **OR** Erythromycin + Amoxicillin _________/_________/_____________ + _________/_________/________________
37. Co-amoxiclav _________/_________/_____________________
38. Co-amoxiclav + clarithromycin OR Azithromycin _________/_________/______________ or _________/_________/_____________
39. Ceftriaxone + Azithromycin OR Erythromycin _________/_________/_______ + _________/_________/____________ OR _________/_________/_______________
40. Benzyl penicillin + Azithromycin OR Erythromycin _________/_________/__________+ _________/_________/____________ OR _________/_________/_______________
41. Ceftazidime + Vancomycin _________/_________/_____________ + _________/_________/________________
42. Ceftriaxone + Gentamicin ______________/_____________/_________________ + ____________/___________________/________________
43. Co-amoxiclav + clarithromycin + metronidazole _________/___________/____________ + _________/___________/___________ + __________/_________/_____________
44. + _________/_________/_______________ OR _________/_________/_______________
45. Ciprofloxacin ____________/____________/_________________
46. **Vancomycin +** _________ _________/_________/_____________ + ____________/___________/________________ (in the case of MRSA)

Analgesics given _________________ _________/_________/_________________

1. **Drug therapy** (________/________/______Drug name/strength/frequency/duration (After 48hrs or 3rd day)
2. Azithromycin _______/_________/_____________________
3. Erythromycin _________/_________/_____________________
4. Doxycycline _________/_________/_____________________
5. Ceftriaxone
6. Azithromycin **OR** Erythromycin + Amoxicillin _________/_________/_____________ + _________/_________/________________
7. Co-amoxiclav _________/_________/_____________________
8. Co-amoxiclav + clarithromycin OR Azithromycin _________/_________/______________ or _________/_________/_____________
9. Ceftriaxone + Azithromycin OR Erythromycin _________/_________/_______ + _________/_________/____________ OR _________/_________/_______________
10. Benzyl penicillin + Azithromycin OR Erythromycin _________/_________/__________+ _________/_________/____________ OR _________/_________/_______________
11. Ceftazidime + Vancomycin _________/_________/_____________ + _________/_________/________________
12. Ceftriaxone + Gentamicin ______________/_____________/_________________ + ____________/___________________/________________
13. Co-amoxiclav + clarithromycin + metronidazole _________/___________/____________ + _________/___________/___________ + __________/_________/_____________
14. + _________/_________/_______________ OR _________/_________/_______________
15. Ciprofloxacin ____________/____________/_________________
16. **Vancomycin +** _________ _________/_________/_____________ + ____________/___________/________________ (in the case of MRSA)

Analgesics given _________________ _________/_________/_________________
